# Supplementary material for: OpcA and PorB are novel bactericidal antigens of the 4CMenB vaccine in mice and humans
Source: PubMed Central journal article supplement (PMC10097807; doi:10.1038/s41541-023-00651-9), 2023-04-12
Supplement: 41541_2023_651_MOESM2_ESM.pdf [file 41541_2023_651_MOESM2_ESM.pdf]

## Supplementary Information

The PDF file includes:

**Supplementary Figure 1.** The vaccine immunotype L3,7,9 is expressed by most, but not all OMV-specific MenB strains.

**Supplementary Figure 2.** OMV antigens were expressed in GMMA obtained from different *E. coli* mutants engineered to hyperbleb.

**Supplementary Figure 3.** Four MenB antigens were expressed in *E. coli* cell lysates but they were not taken up by the corresponding GMMA.

**Supplementary Figure 4.** Thirteen different meningococcal proteins were obtained as recombinant antigens.

**Supplementary Figure 5.** Western blot analyses revealed that sera raised by mouse immunizations recognized the specific antigen expressed by different meningococci.

**Supplementary Figure 6.** ELISA measured the specific IgG titres in mice immunized with different *E. coli* GMMA and recombinant proteins.

**Supplementary Figure 7.** Estimation of the amount of the heterologous meningococcal antigen present in *E. coli* GMMA by comparative Western blots.

**Supplementary Figure 8.** FACS analysis of live *N. meningitidis* B strains using sera prepared against PorA, OpcA, PorB and NspA antigens.

**Supplementary Figure 9.** Uncropped and unprocessed Western blots used for Fig.4.

**Supplementary Figure 10.** Exemplification of the gating strategy used for FACS analyses of Fig. 4 and Supplementary Figure 8.

**Supplementary Table 1.** Rabbit SBA screening of polyclonal sera not reactive to OMV according to protein array analysis.

**Supplementary Table 2.** List of strains used in this study.

**Supplementary Table 3.** Meningococcal antigens cloned in this study.

**Supplementary Table 4.** List of primers used in this study.

**Supplementary Table 5.** List of plasmids used in this study.

**References**<sup>1-4</sup>

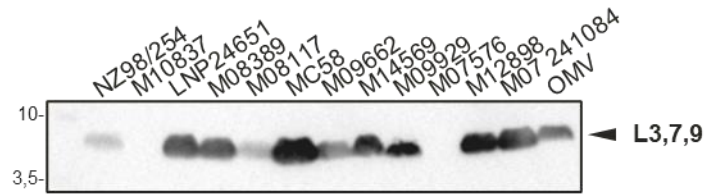

**Supplementary Figure 1. The vaccine immunotype L3,7,9 was expressed by most, but not all, OMV-specific MenB strains.** Whole cell lysates, prepared from bacteria grown in SBA-like conditions and OMV were resolved in SDS-PAGE prior to Western blotting. The membrane was probed with the immunotype specific monoclonal antibody L3,7,9. LOS bands are indicated by the arrow.

**a**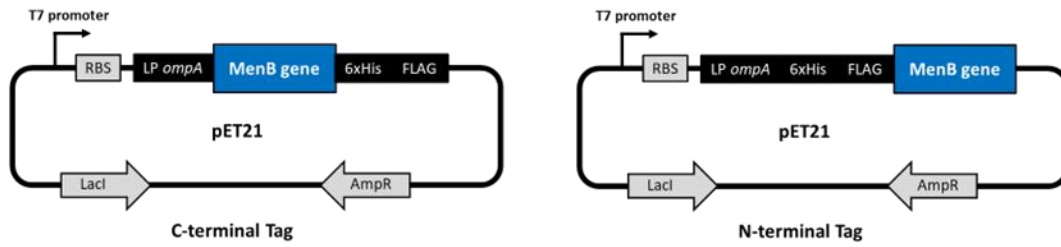**b**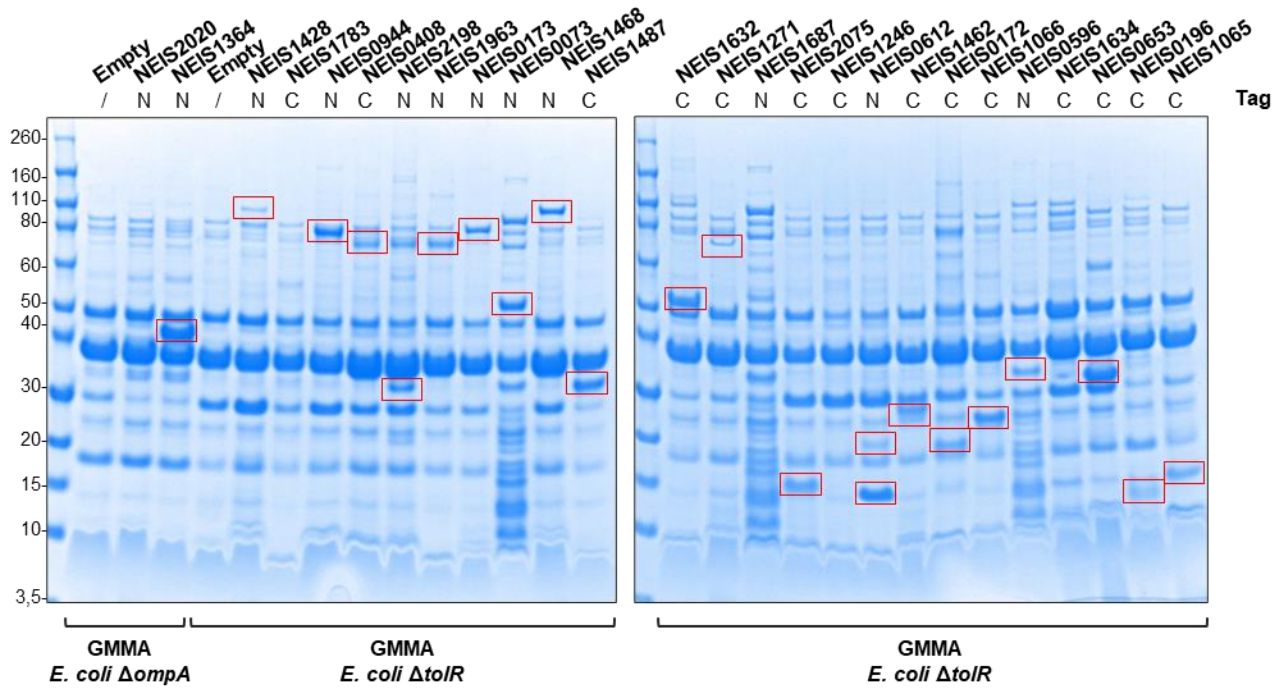**c**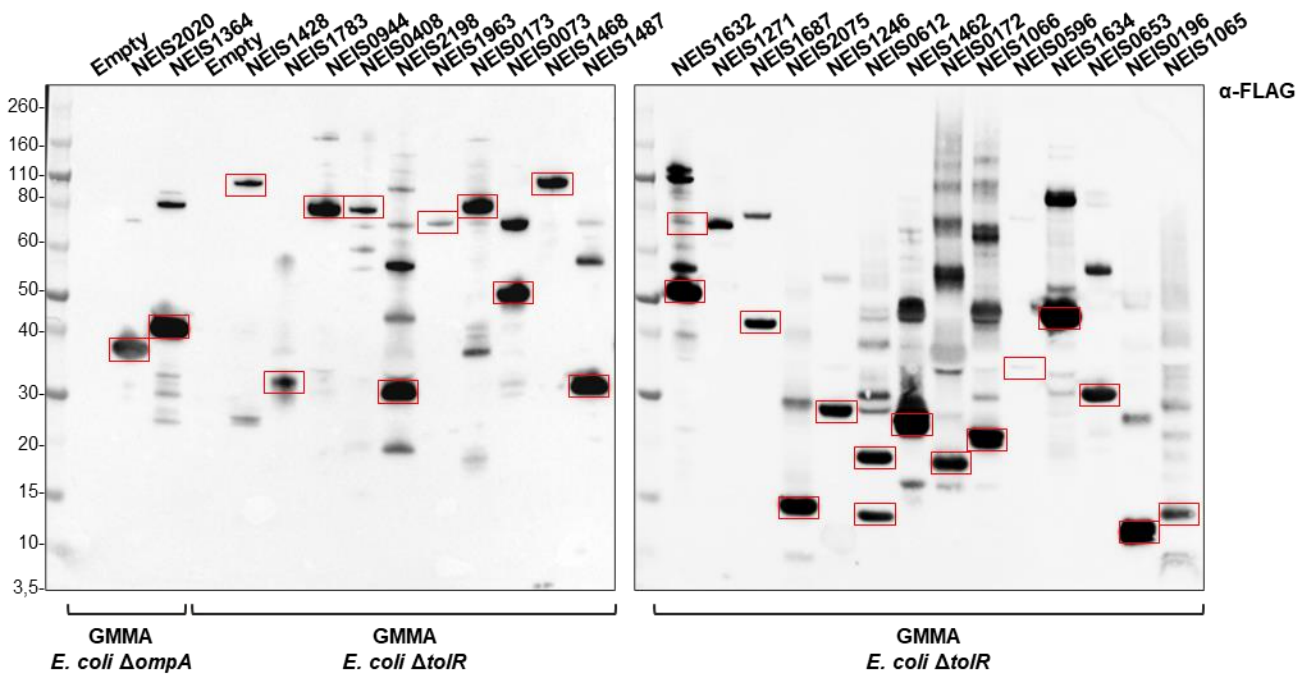

**Supplementary Figure 2. OMV antigens were expressed in GMMA obtained from different *E. coli* mutants engineered to hyperbleb.** (a) Two different strategies were adopted for the cloning of meningococcal proteins into the expression vectors. The two vector maps differ only in the location of the tags, either carboxy- or amino-terminal (left and right maps, respectively). The vectors carry the IPTG-inducible T7 promoter, the leader peptide (LP) of the *E. coli ompA* and tag sequences composed of six-histidine (6xHis) and the FLAG. The cloning site of heterologous antigens is represented by the blue box labelled “MenB gene”. RBS, ribosome binding site; LacI, *lac* repressor; AmpR, ampicillin resistance. Recombinant *E. coli* GMMA decorated with meningococcal antigens were analysed by (b) Coomassie blue stained SDS-PAGE and (c) Western blot probed with  $\alpha$ -FLAG antibodies. Bands corresponding to recombinant antigens are boxed in red. Location of the tag sequence (N, N-terminal and C, C-terminal) as well as *E. coli* strains used for GMMA production are indicated.

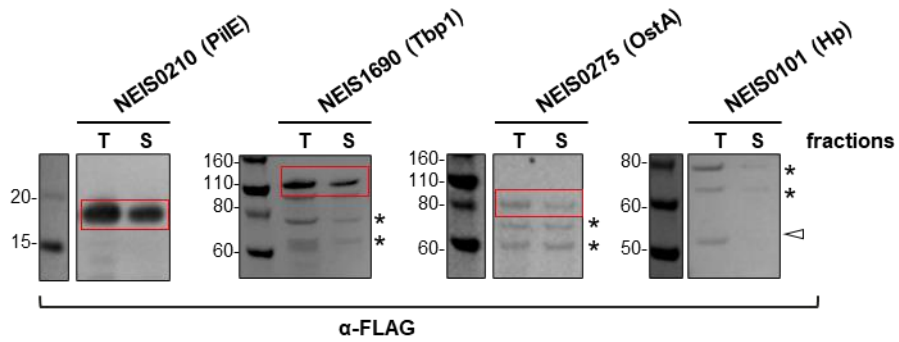

**Supplementary Figure 3. Four MenB antigens were expressed in *E. coli* cell lysates but they were not taken up by the corresponding GMMA.** Western blots probed with anti-FLAG antibodies were carried out on *E. coli* BL21  $\Delta tolR$  total (T) and soluble (S) cell-extract fractions expressing the specific MenB antigens with C-terminal tags. Bands corresponding to recombinant antigens are boxed. The open arrow indicates the expression of NEIS0101 exclusively in the total cell extract fraction. \* indicates not specific band.

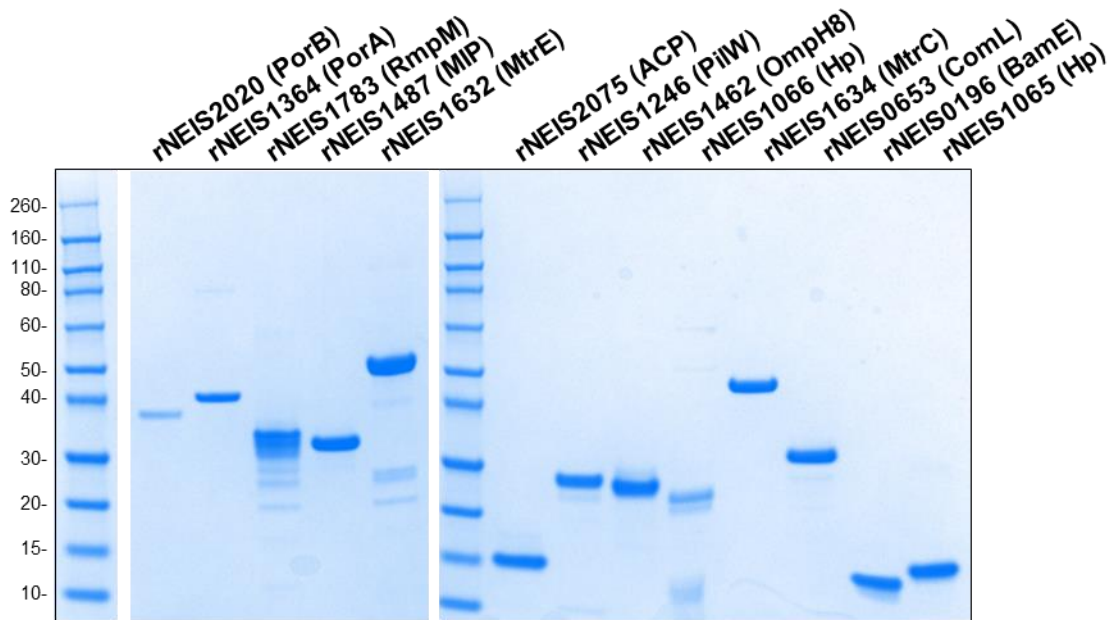

**Supplementary Figure 4. Thirteen different meningococcal proteins were obtained as recombinant antigens.** Equal amounts of meningococcal antigens (2  $\mu\text{g}/\text{lane}$ , except for NEIS2020 (PorB) and NEIS1066 (Hp) 1  $\mu\text{g}/\text{lane}$ ) were resolved in a Sodium Dodecyl Sulphate - PolyAcrylamide Gel Electrophoresis and were stained with Coomassie blue.

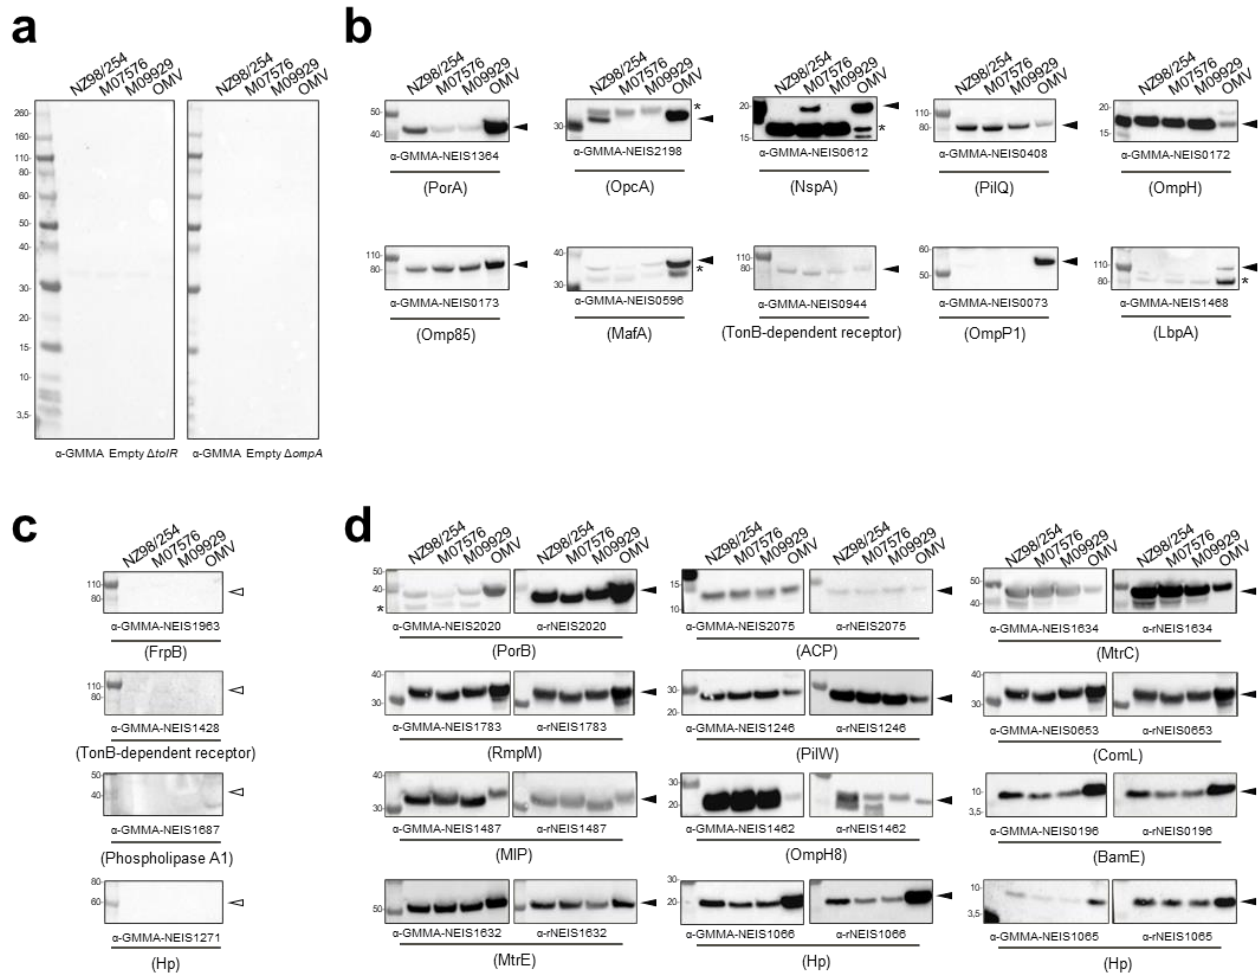

**Supplementary Figure 5. Western blot analyses revealed that sera raised by mouse immunizations recognized the specific antigen expressed by different meningococci.** Equal amounts of whole cell lysates as well as OMV were separated by SDS-PAGE prior to Western blotting. The specific antisera raised against: **(a)** GMMA Empty (negative control); **(b-c)** engineered GMMA and **(d)** coupled GMMA-recombinant used to probe each membrane are listed beneath each blot. All specific sera used for the analysis are pooled ( $n = 8$ ). Protein bands corresponding to the expected molecular size of the protein are indicated by closed arrows. Open arrows indicate the molecular weight at which the specific-reactive band was expected. The asterisk pinpoints non-specific bands. Hp = hypothetical protein.

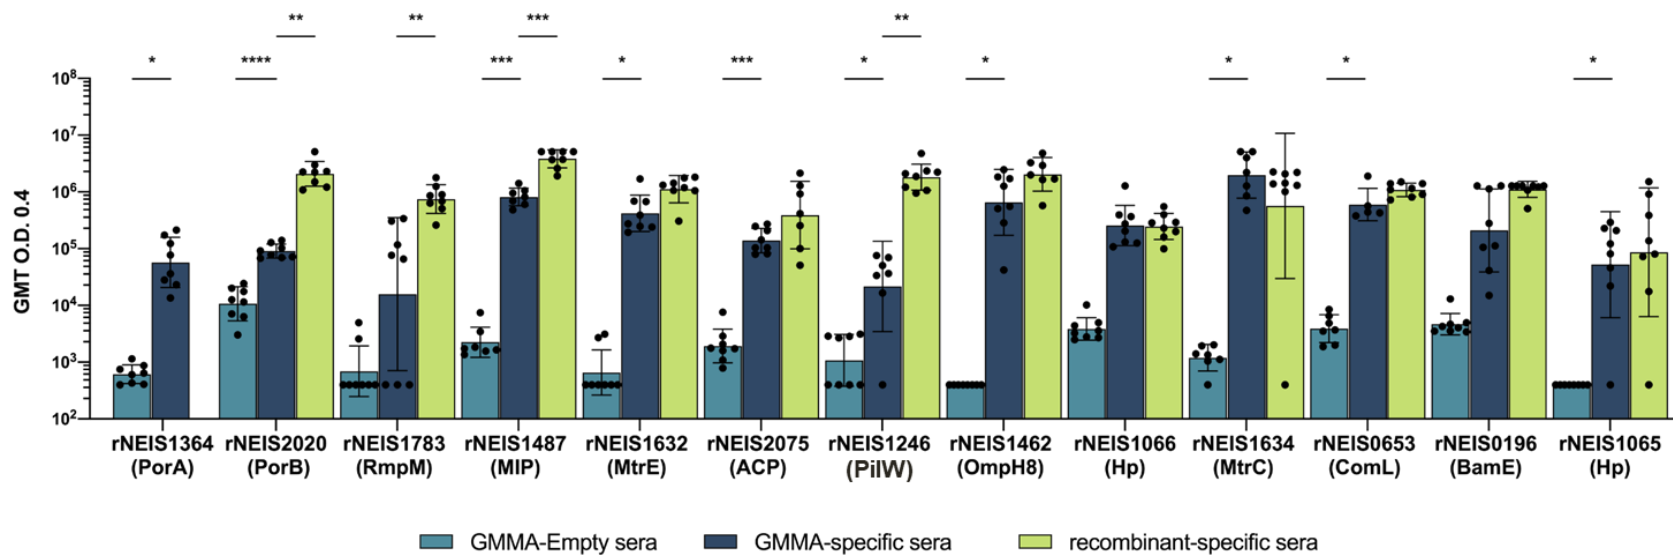

**Supplementary Figure 6. ELISA measured the specific IgG titres in mice immunized with different *E. coli* GMMA and recombinant proteins.** IgG titres were determined by ELISA using plates coated with the 13 recombinant antigens, listed on the X axis. Light blue bars indicate GMMA Empty antisera used as negative control, in particular *E. coli* GMMA Empty  $\Delta ompA$  antisera was used for the plates coated with PorA and PorB antigens, whereas all the other coatings were probed with *E. coli* GMMA Empty  $\Delta tolR$  antisera. Dark blue and green bars indicate the GMMA-specific and recombinant antigen-specific antisera which correspond to antigen used to coat the plates, respectively. Each dot represents the titre obtained from an individual mouse serum, while histograms indicate the geometric mean (GMT) value within each immunization, expressed as the reciprocal of the serum dilution yielding an OD value of 0.4. Error bars of each mouse group describe the geometric standard deviation. Statistical analysis was performed applying the t-student test and  $p$ -values  $\leq 0.05$  were considered statistically significant (\*  $p \leq 0.05$ ; \*\*  $p \leq 0.01$ ; \*\*\*  $p \leq 0.001$ , \*\*\*\*  $p \leq 0.0001$ ). Hp = hypothetical protein.



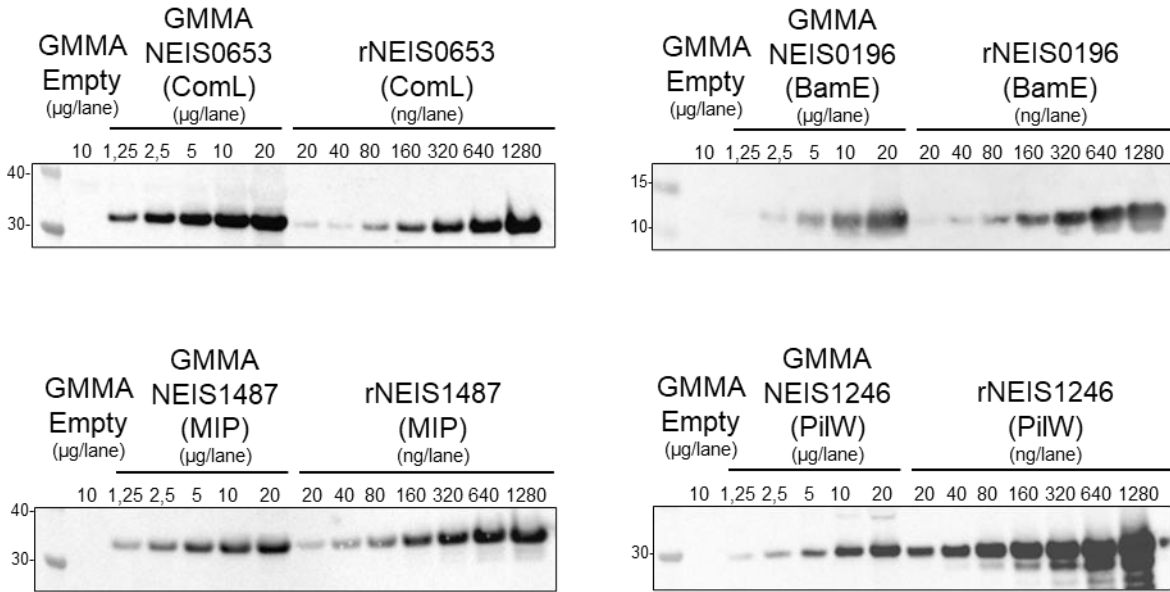

**Supplementary Figure 7. Estimation of the amount of the heterologous meningococcal antigen present in *E. coli* GMMA by comparative Western blots.** Different amount of GMMA were loaded onto 4-12% SDS-polyacrylamide gels together with increasing concentrations of the corresponding purified recombinant protein used as standard. Western blots were then probed with anti-FLAG antibodies. From the comparison of band intensities, the following percentages were determined: NEIS0653: 18%; NEIS0196: 3.2%; NEIS1487: 2.1%; NEIS1246: 0.27%.

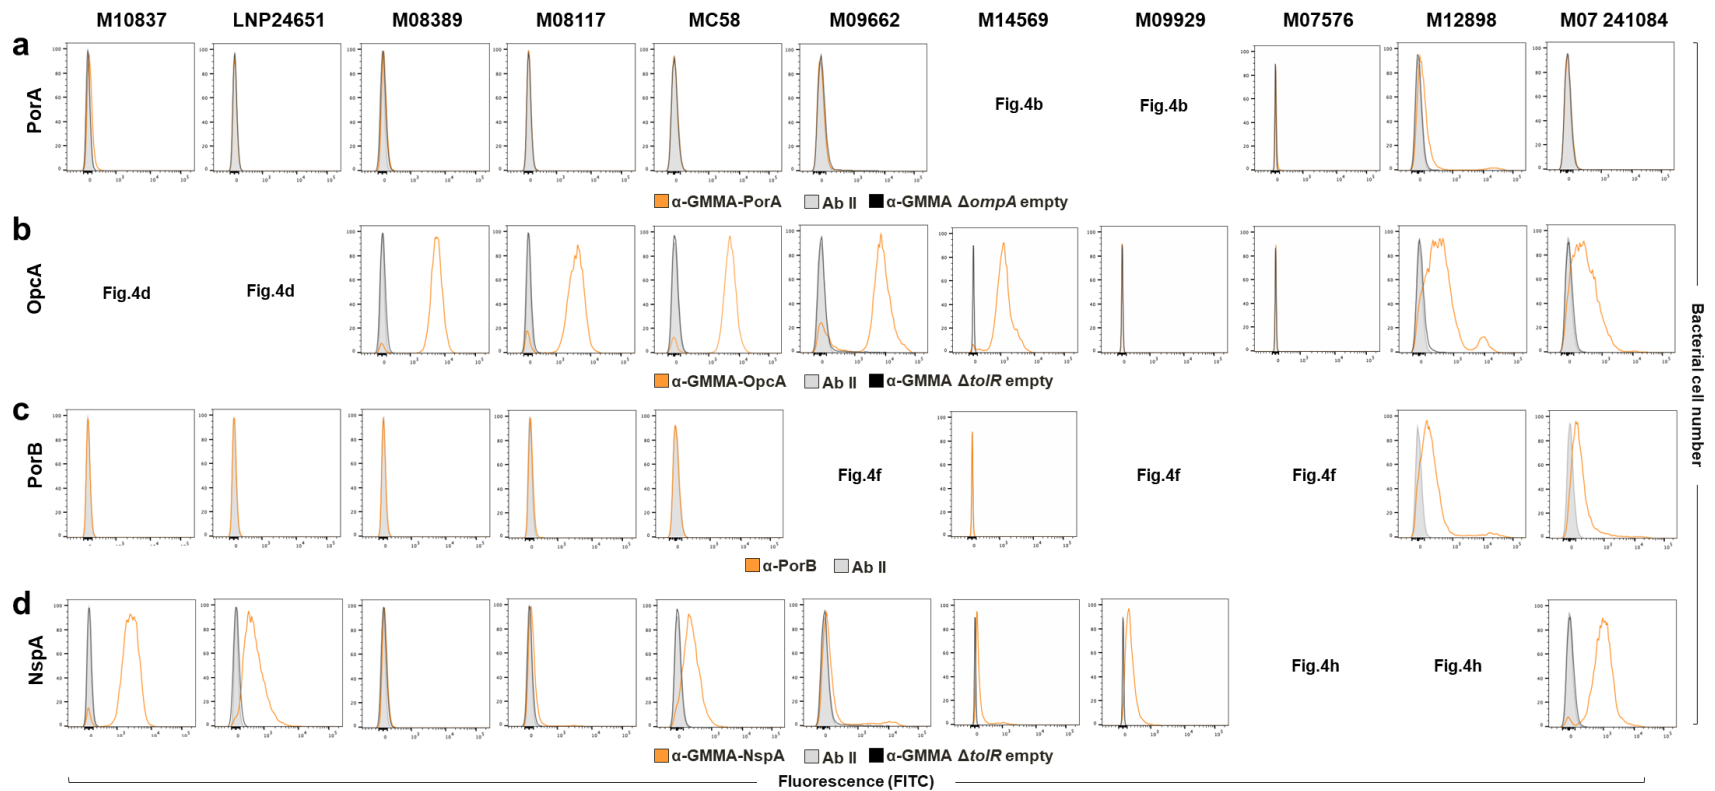

**Supplementary Figure 8. FACS analysis of live *N. meningitidis* B strains using sera prepared against PorA, OpcA, PorB and NspA antigens.** The binding of antisera raised by PorA (a), OpcA (b), PorB (c) and NspA (d) antigens was assessed by flow cytometry. Shaded grey profiles represent bacterial cells stained with secondary antibodies alone; non-shaded dark grey profiles indicate sera raised against GMMA empty  $\Delta tolR$  and  $\Delta ompA$  (negative controls); non-shaded orange profiles show the reaction with specific immune sera. Ab II: secondary antibody.

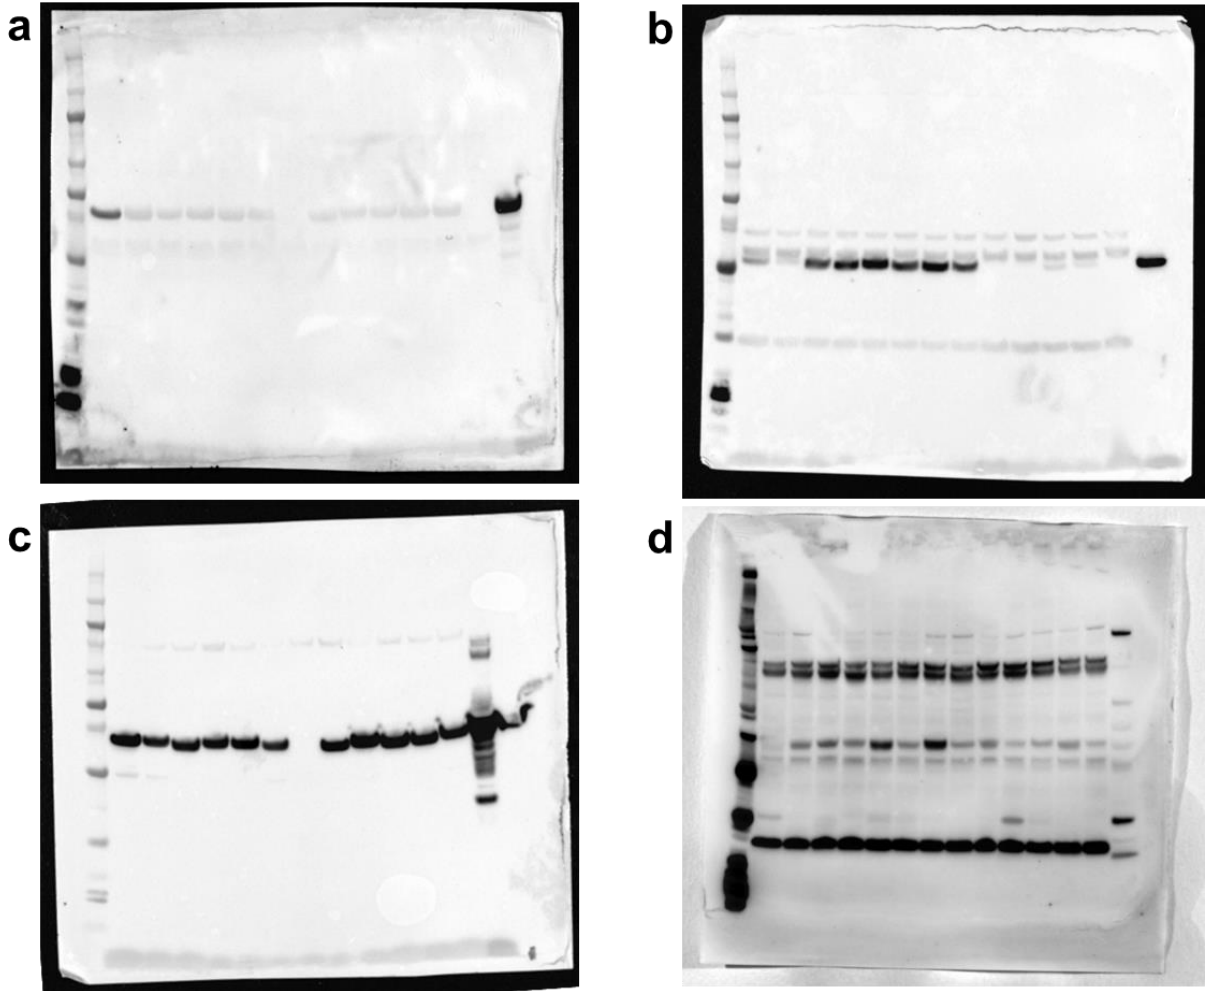

**Supplementary Figure 9. Uncropped and unprocessed Western blots used for Fig.4.** The uncropped and unprocessed scans probed with GMMA-PorA (a), GMMA-OpcA (b), rPorB (c) and GMMA-NspA (d) sera used for Fig. 4 are reported.

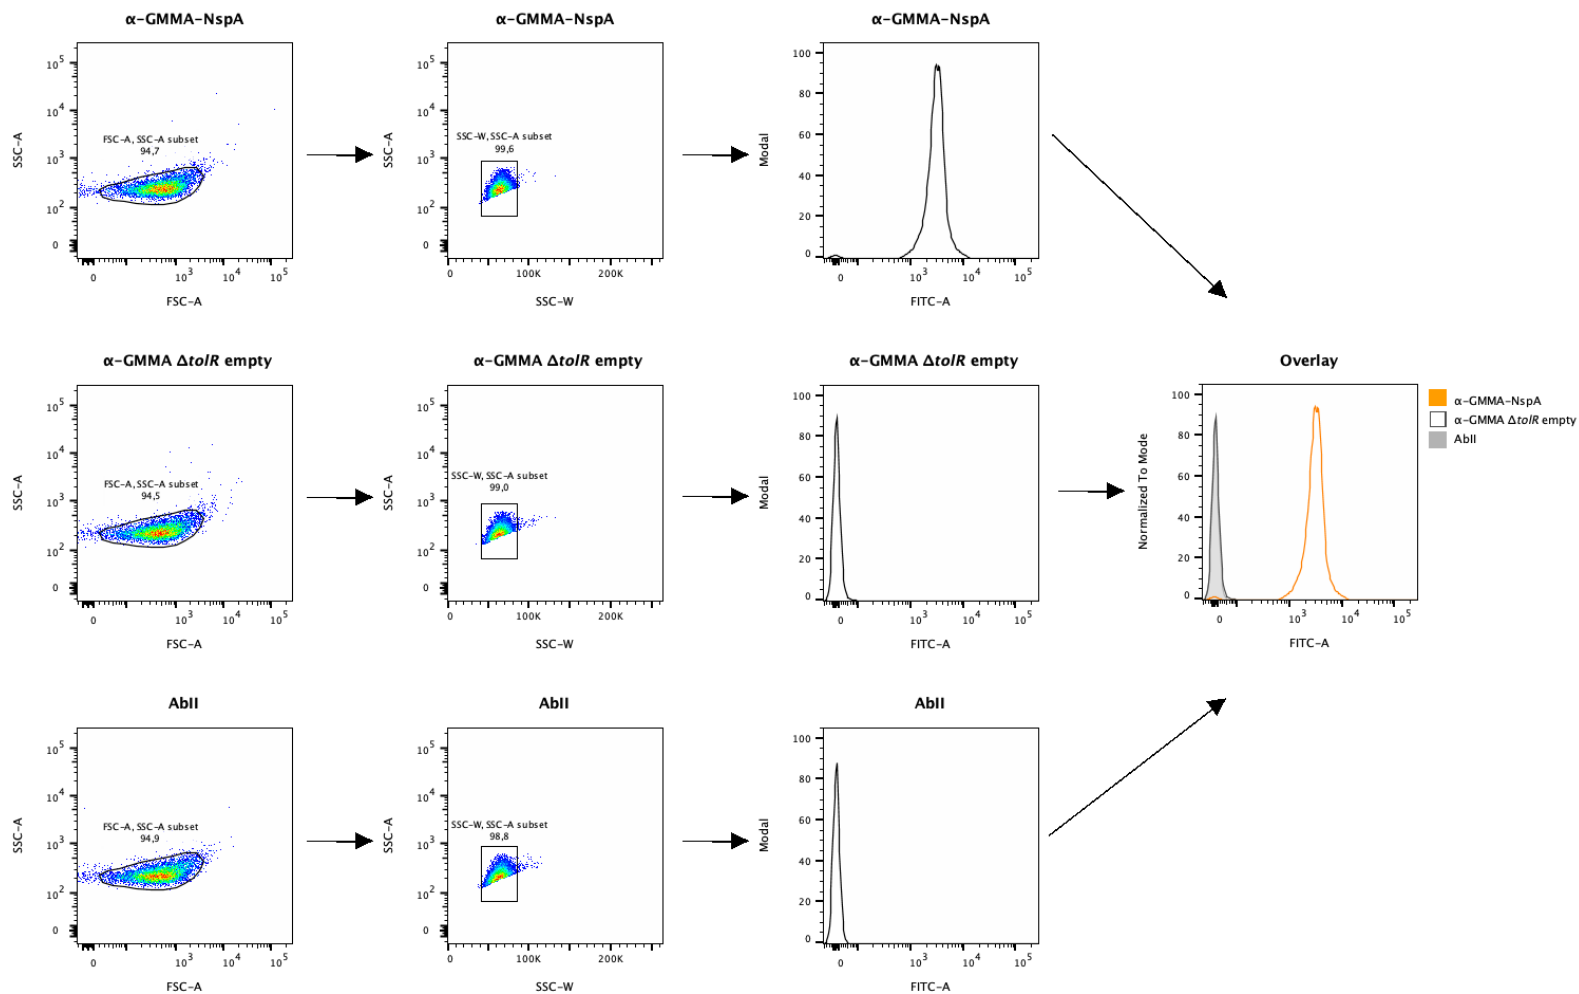

**Supplementary Figure 10. Exemplification of the gating strategy used for FACS analyses of Fig.4 and Supplementary Figure 8.**

The dot plots show the gating strategy used for MenB surface staining, using M07576 as example. Morphology was determined with the FSC-A vs SSC-A, singlets with SSC-W vs SSC-A, the population of interest as FITC<sup>+</sup> vs SSC-A, represented as histogram. Finally, the images were represented as the overlay of negative controls (AbII and  $\alpha$ -GMMA empty) vs tested sample.

| Sera not reactive<br>in protein array with OMV sera | rSBA on three MenB strains |        |        |
|-----------------------------------------------------|----------------------------|--------|--------|
|                                                     | NZ98/254                   | M07576 | M09929 |
| GMMA empty $\Delta tolR$                            | <16                        | <16    | <16    |
| GMMA empty $\Delta ompA$                            | <16                        | <16    | <16    |
| GMMA-NEIS0944                                       | <16                        | <16    | <16    |
| GMMA-NEIS0408 (PilQ)                                | <16                        | <16    | <16    |
| GMMA-NEIS0073 (OmpP1)                               | <16                        | <16    | <16    |
| GMMA-NEIS1468 (LbpA)                                | <16                        | <16    | <16    |
| GMMA-NEIS1487 (MIP)                                 | <16                        | <16    | <16    |
| rNEIS1487 (MIP)                                     | <16                        | <16    | <16    |
| GMMA-NEIS2075 (ACP)                                 | <16                        | <16    | <16    |
| rNEIS2075 (ACP)                                     | <16                        | <16    | <16    |
| GMMA-NEIS1246 (PilW)                                | <16                        | <16    | <16    |
| rNEIS1246 (PilW)                                    | <16                        | <16    | <16    |
| GMMA-NEIS1462 (OmpH8)                               | <16                        | <16    | <16    |
| rNEIS1462 (OmpH8)                                   | <16                        | <16    | <16    |
| GMMA-NEIS0172 (OmpH)                                | <16                        | <16    | <16    |
| GMMA-NEIS1066 (Hp)                                  | <16                        | <16    | <16    |
| rNEIS1066 (Hp)                                      | <16                        | <16    | <16    |
| GMMA-NEIS0596 (MafA)                                | <16                        | <16    | <16    |
| GMMA-NEIS1634 (MtrC)                                | <16                        | <16    | <16    |
| rNEIS1634 (MtrC)                                    | <16                        | <16    | <16    |
| GMMA-NEIS0653 (ComL)                                | <16                        | <16    | <16    |
| rNEIS0653 (ComL)                                    | <16                        | <16    | <16    |
| GMMA-NEIS1065 (Hp)                                  | <16                        | <16    | <16    |
| rNEIS1065 (Hp)                                      | <16                        | <16    | <16    |

**Supplementary Table 1. Rabbit SBA screening of polyclonal sera not reactive to OMV according to protein array analysis.** NZ98/254, M07576 and M09929 were analysed for their susceptibility to killing by different polyclonal sera through rSBA. Each sample tested is a pool made from 8 individual mouse serum.

**Supplementary Table 2. List of strains used in this study.**

| Name                               | Description                                                                                                    | Antibiotic resistance | Reference  |
|------------------------------------|----------------------------------------------------------------------------------------------------------------|-----------------------|------------|
| BL21(DE3) $\Delta tolR$            | BL21(DE3) derivative, lacking <i>tolR</i> gene                                                                 | KanR                  | 4          |
| BL21(DE3) $\Delta ompA$            | BL21(DE3) derivative, lacking <i>ompA</i> gene                                                                 | CmR                   | 3          |
| BL21(DE3) $\Delta tolR$ Empty      | BL21(DE3) $\Delta tolR$ derivative, carryng the pET15b plasmid                                                 | KanR                  | This study |
| BL21(DE3) $\Delta ompA$ Empty      | BL21(DE3) $\Delta ompA$ derivative, carryng the pET15b plasmid                                                 | CmR                   | This study |
| BL21(DE3) $\Delta ompA$ NEIS2020   | BL21(DE3) $\Delta ompA$ derivative, carryng the pET21-LPompA NEIS2020_N plasmid for the expression of NEIS2020 | CmR, AmpR             | This study |
| BL21(DE3) $\Delta ompA$ NEIS1364   | BL21(DE3) $\Delta ompA$ derivative, carryng the pET21-LPompA NEIS1364_N plasmid for the expression of NEIS1364 | CmR, AmpR             | This study |
| BL21(DE3) $\Delta tolR$ NEIS1428   | BL21(DE3) $\Delta tolR$ derivative, carryng the pET21-LPompA NEIS1428_N plasmid for the expression of NEIS1428 | KanR, AmpR            | This study |
| BL21(DE3) $\Delta tolR$ NEIS1783   | BL21(DE3) $\Delta tolR$ derivative, carryng the pET21-LPompA NEIS1783_C plasmid for the expression of NEIS1783 | KanR, AmpR            | This study |
| BL21(DE3) $\Delta tolR$ NEIS0944   | BL21(DE3) $\Delta tolR$ derivative, carryng the pET21-LPompA NEIS0944_N plasmid for the expression of NEIS0944 | KanR, AmpR            | This study |
| BL21(DE3) $\Delta tolR$ NEIS0408   | BL21(DE3) $\Delta tolR$ derivative, carryng the pET21-LPompA NEIS0408_C plasmid for the expression of NEIS0408 | KanR, AmpR            | This study |
| BL21(DE3) $\Delta tolR$ NEIS2198   | BL21(DE3) $\Delta tolR$ derivative, carryng the pET21-LPompA NEIS2198_N plasmid for the expression of NEIS2198 | KanR, AmpR            | This study |
| BL21(DE3) $\Delta tolR$ NEIS1963   | BL21(DE3) $\Delta tolR$ derivative, carryng the pET21-LPompA NEIS1963_N plasmid for the expression of NEIS1963 | KanR, AmpR            | This study |
| BL21(DE3) $\Delta tolR$ NEIS1690_C | BL21(DE3) $\Delta tolR$ derivative, carryng the pET21-LPompA NEIS1690_C plasmid for the expression of NEIS1690 | KanR, AmpR            | This study |
| BL21(DE3) $\Delta tolR$ NEIS1690_N | BL21(DE3) $\Delta tolR$ derivative, carryng the pET21-LPompA NEIS1690_N plasmid for the expression of NEIS1690 | KanR, AmpR            | This study |
| BL21(DE3) $\Delta tolR$ NEIS0173   | BL21(DE3) $\Delta tolR$ derivative, carryng the pET21-LPompA NEIS0173_N plasmid for the expression of NEIS0173 | KanR, AmpR            | This study |
| BL21(DE3) $\Delta tolR$ NEIS0073   | BL21(DE3) $\Delta tolR$ derivative, carryng the pET21-LPompA NEIS0073_N plasmid for the expression of NEIS0073 | KanR, AmpR            | This study |
| BL21(DE3) $\Delta tolR$ NEIS1468   | BL21(DE3) $\Delta tolR$ derivative, carryng the pET21-LPompA NEIS1468_N plasmid for the expression of NEIS1468 | KanR, AmpR            | This study |
| BL21(DE3) $\Delta tolR$ NEIS0275_C | BL21(DE3) $\Delta tolR$ derivative, carryng the pET21-LPompA NEIS0275_C plasmid for the expression of NEIS0275 | KanR, AmpR            | This study |
| BL21(DE3) $\Delta tolR$ NEIS0275_N | BL21(DE3) $\Delta tolR$ derivative, carryng the pET21-LPompA NEIS0275_N plasmid for the expression of NEIS0275 | KanR, AmpR            | This study |
| BL21(DE3) $\Delta tolR$ NEIS1487   | BL21(DE3) $\Delta tolR$ derivative, carryng the pET21-LPompA NEIS1487_C plasmid for the expression of NEIS1487 | KanR, AmpR            | This study |
| BL21(DE3) $\Delta tolR$ NEIS1632   | BL21(DE3) $\Delta tolR$ derivative, carryng the pET21-LPompA NEIS1632_C plasmid for the expression of NEIS1632 | KanR, AmpR            | This study |
| BL21(DE3) $\Delta tolR$ NEIS0101_C | BL21(DE3) $\Delta tolR$ derivative, carryng the pET21-LPompA NEIS0101_C plasmid for the expression of NEIS0101 | KanR, AmpR            | This study |

|                                    |                                                                                                                 |            |              |
|------------------------------------|-----------------------------------------------------------------------------------------------------------------|------------|--------------|
| BL21(DE3) $\Delta tolR$ NEIS0101_N | BL21(DE3) $\Delta tolR$ derivative, carrying the pET21-LPompA NEIS0101_N plasmid for the expression of NEIS0101 | KanR, AmpR | This study   |
| BL21(DE3) $\Delta tolR$ NEIS1271   | BL21(DE3) $\Delta tolR$ derivative, carrying the pET21-LPompA NEIS1271_C plasmid for the expression of NEIS1271 | KanR, AmpR | This study   |
| BL21(DE3) $\Delta tolR$ NEIS1687   | BL21(DE3) $\Delta tolR$ derivative, carrying the pET21-LPompA NEIS1687_N plasmid for the expression of NEIS1687 | KanR, AmpR | This study   |
| BL21(DE3) $\Delta tolR$ NEIS0210_C | BL21(DE3) $\Delta tolR$ derivative, carrying the pET21-LPompA NEIS0210_C plasmid for the expression of NEIS0210 | KanR, AmpR | This study   |
| BL21(DE3) $\Delta tolR$ NEIS0210_N | BL21(DE3) $\Delta tolR$ derivative, carrying the pET21-LPompA NEIS0210_N plasmid for the expression of NEIS0210 | KanR, AmpR | This study   |
| BL21(DE3) $\Delta tolR$ NEIS2075   | BL21(DE3) $\Delta tolR$ derivative, carrying the pET21-LPompA NEIS2075_C plasmid for the expression of NEIS2075 | KanR, AmpR | This study   |
| BL21(DE3) $\Delta tolR$ NEIS1246   | BL21(DE3) $\Delta tolR$ derivative, carrying the pET21-LPompA NEIS1246_C plasmid for the expression of NEIS1246 | KanR, AmpR | This study   |
| BL21(DE3) $\Delta tolR$ NEIS0612   | BL21(DE3) $\Delta tolR$ derivative, carrying the pET21-LPompA NEIS0612_N plasmid for the expression of NEIS0612 | KanR, AmpR | This study   |
| BL21(DE3) $\Delta tolR$ NEIS1462   | BL21(DE3) $\Delta tolR$ derivative, carrying the pET21-LPompA NEIS1462_C plasmid for the expression of NEIS1462 | KanR, AmpR | This study   |
| BL21(DE3) $\Delta tolR$ NEIS0172   | BL21(DE3) $\Delta tolR$ derivative, carrying the pET21-LPompA NEIS0172_C plasmid for the expression of NEIS0172 | KanR, AmpR | This study   |
| BL21(DE3) $\Delta tolR$ NEIS1066   | BL21(DE3) $\Delta tolR$ derivative, carrying the pET21-LPompA NEIS1066_C plasmid for the expression of NEIS1066 | KanR, AmpR | This study   |
| BL21(DE3) $\Delta tolR$ NEIS0596   | BL21(DE3) $\Delta tolR$ derivative, carrying the pET21-LPompA NEIS0596_N plasmid for the expression of NEIS0596 | KanR, AmpR | This study   |
| BL21(DE3) $\Delta tolR$ NEIS1634   | BL21(DE3) $\Delta tolR$ derivative, carrying the pET21-LPompA NEIS1634_C plasmid for the expression of NEIS1634 | KanR, AmpR | This study   |
| BL21(DE3) $\Delta tolR$ NEIS0653   | BL21(DE3) $\Delta tolR$ derivative, carrying the pET21-LPompA NEIS0653_C plasmid for the expression of NEIS0653 | KanR, AmpR | This study   |
| BL21(DE3) $\Delta tolR$ NEIS0196   | BL21(DE3) $\Delta tolR$ derivative, carrying the pET21-LPompA NEIS0196_C plasmid for the expression of NEIS0196 | KanR, AmpR | This study   |
| BL21(DE3) $\Delta tolR$ NEIS1065   | BL21(DE3) $\Delta tolR$ derivative, carrying the pET21-LPompA NEIS1065_C plasmid for the expression of NEIS1065 | KanR, AmpR | This study   |
| NZ98/254                           | Clinical isolate                                                                                                | /          | /            |
| M08389                             | Clinical isolate                                                                                                | /          | /            |
| LNP24651                           | Clinical isolate                                                                                                | /          | /            |
| M08117                             | Clinical isolate                                                                                                | /          | /            |
| M10837                             | Clinical isolate                                                                                                | /          | /            |
| MC58                               | <i>Neisseria meningitidis</i> laboratory-adapted reference strain                                               | /          | <sup>1</sup> |
| M09662                             | Clinical isolate                                                                                                | /          | /            |
| M14569                             | Clinical isolate                                                                                                | /          | /            |
| M07576                             | Clinical isolate                                                                                                | /          | /            |
| M09929                             | Clinical isolate                                                                                                | /          | /            |
| M12898                             | Clinical isolate                                                                                                | /          | /            |
| M07 241084                         | Clinical isolate                                                                                                | /          | /            |
| NZ98/254 $\Delta porA$             | NZ98/254 derivative, lacking <i>porA</i> gene                                                                   | SpecR      | This study   |
| LNP24651 $\Delta opcA$             | LNP24651 derivative, lacking <i>opcA</i> gene                                                                   | KanR       | This study   |
| M07576 $\Delta nspA$               | M07576 derivative, lacking <i>nspA</i> gene                                                                     | EryR       | This study   |

AmpR, ampicillin resistance; CmR, chloramphenicol resistance; EryR, erythromycin resistance; KanR, kanamycin resistance; SpecR, spectinomycin resistance.



**Supplementary Table 3. Meningococcal antigens cloned in this study.**

| PubMLST  | Leader sequence |                                | Mw<br>(kDa) | Tag<br>(6xHis + FLAG) | <i>E. coli</i> cells<br>used for transformation |
|----------|-----------------|--------------------------------|-------------|-----------------------|-------------------------------------------------|
|          | Removed         | Amino acid residues<br>removed |             |                       |                                                 |
| NEIS2020 | yes             | 1-19                           | 35.7        | N-term                | BL21(DE3) $\Delta ompA$                         |
| NEIS1364 | yes             | 1-19                           | 41.6        | N-term                | BL21(DE3) $\Delta ompA$                         |
| NEIS1428 | yes             | 1-25                           | 103         | N-term                | BL21(DE3) $\Delta tolR$                         |
| NEIS1783 | yes             | 1-22                           | 25.7        | C-term                | BL21(DE3) $\Delta tolR$                         |
| NEIS0944 | yes             | 1-24                           | 84.3        | N-term                | BL21(DE3) $\Delta tolR$                         |
| NEIS0408 | yes             | 1-24                           | 82          | C-term                | BL21(DE3) $\Delta tolR$                         |
| NEIS2198 | yes             | 1-19                           | 30          | N-term                | BL21(DE3) $\Delta tolR$                         |
| NEIS1963 | yes             | 1-22                           | 78.7        | N-term                | BL21(DE3) $\Delta tolR$                         |
| NEIS1690 | yes             | 1-24                           | 101.3       | C-term/N-term         | BL21(DE3) $\Delta tolR$                         |
| NEIS0173 | yes             | 1-21                           | 88.2        | N-term                | BL21(DE3) $\Delta tolR$                         |
| NEIS0073 | yes             | 1-24                           | 50.2        | N-term                | BL21(DE3) $\Delta tolR$                         |
| NEIS1468 | yes             | 1-24                           | 105.2       | N-term                | BL21(DE3) $\Delta tolR$                         |
| NEIS0275 | yes             | 1-23                           | 88          | C-term/N-term         | BL21(DE3) $\Delta tolR$                         |
| NEIS1487 | yes             | 1-22                           | 28.7        | C-term                | BL21(DE3) $\Delta tolR$                         |
| NEIS1632 | yes             | 1-39                           | 50.2        | C-term                | BL21(DE3) $\Delta tolR$                         |
| NEIS0101 | no              | -                              | 52          | C-term/N-term         | BL21(DE3) $\Delta tolR$                         |
| NEIS1271 | yes             | 1-20                           | 66.2        | C-term                | BL21(DE3) $\Delta tolR$                         |
| NEIS1687 | yes             | 1-22                           | 41.5        | N-term                | BL21(DE3) $\Delta tolR$                         |
| NEIS0210 | no              | -                              | 19.4        | C-term/N-term         | BL21(DE3) $\Delta tolR$                         |
| NEIS2075 | yes             | 1-21                           | 13.2        | C-term                | BL21(DE3) $\Delta tolR$                         |
| NEIS1246 | yes             | 1-37                           | 27.6        | C-term                | BL21(DE3) $\Delta tolR$                         |
| NEIS0612 | yes             | 1-19                           | 18.5        | N-term                | BL21(DE3) $\Delta tolR$                         |
| NEIS1462 | yes             | 1-23                           | 18.2        | C-term                | BL21(DE3) $\Delta tolR$                         |
| NEIS0172 | yes             | 1-23                           | 18.8        | C-term                | BL21(DE3) $\Delta tolR$                         |
| NEIS1066 | yes             | 1-22                           | 23.8        | C-term                | BL21(DE3) $\Delta tolR$                         |
| NEIS0596 | yes             | 1-25                           | 33.2        | N-term                | BL21(DE3) $\Delta tolR$                         |
| NEIS1634 | yes             | 1-26                           | 42.3        | C-term                | BL21(DE3) $\Delta tolR$                         |
| NEIS0653 | yes             | 1-18                           | 31          | C-term                | BL21(DE3) $\Delta tolR$                         |
| NEIS0196 | yes             | 1-18                           | 14.01       | C-term                | BL21(DE3) $\Delta tolR$                         |
| NEIS1065 | yes             | 1-24                           | 13.1        | C-term                | BL21(DE3) $\Delta tolR$                         |

**Supplementary Table 4. List of primers used in this study.**

| Name             | Sequence                                 | Application                                                | Reference  |
|------------------|------------------------------------------|------------------------------------------------------------|------------|
| HISFLAG Fw       | catcaccatcaccatCACGATTACAAAGAC           | vPCR for cloning the antigens with a C-terminal Tag (Fw)   | This study |
| OmpRev           | ggcctgcgctacggtAGCGAAA                   | vPCR for cloning the antigens with a C-terminal Tag (Rev)  | This study |
| For-pet21        | tgagatccggctgcTAACAAAGCCCGAAAGG          | vPCR for cloning the antigens with a N-terminal Tag (Fw)   | This study |
| HisFlagRev-pet21 | cttgatcatcgtcTTTGTAATCGTGATGGTGATGG      | vPCR for cloning the antigens with a N-terminal Tag (Rev)  | This study |
| NEIS2020-Fw_n    | gacgatgatgacaagGACGTTACCCTGTACGGCACCA    | iPCR for cloning of NEIS2020 with the N-terminal Tag (Fw)  | This study |
| NEIS2020-Rv_n    | gcagccggatctcaGAATTTGTGGCGCAGACCGACA     | iPCR for cloning of NEIS2020 with the N-terminal Tag (Rev) | This study |
| NEIS1364-Fw_n    | gacgatgatgacaagGATGTCAGCCTATACGGCGAAAT   | iPCR for cloning of NEIS1364 with the N-terminal Tag (Fw)  | This study |
| NEIS1364-Rv_n    | gcagccggatctcaGAATTTGTGGCGCAAACCGACG     | iPCR for cloning of NEIS1364 with the N-terminal Tag (Rev) | This study |
| NEIS1428-Fw_n    | gacgatgatgacaagGAAGATGCAGGGCGCGCGGG      | iPCR for cloning of NEIS1428 with the N-terminal Tag (Fw)  | This study |
| NEIS1428-Rv_n    | gcagccggatctcaAACTTGTAGCTCATCGTTATCAAAA  | iPCR for cloning of NEIS1428 with the N-terminal Tag (Rev) | This study |
| NEIS1783-Fw_c    | accgtagcgcaggccGGCGAGGCGTCCGTTACG        | iPCR for cloning of NEIS1783 with the C-terminal Tag (Fw)  | This study |
| NEIS1783-Rv_c    | atggtgatggtgatgGTGTTGGTGATGATTGTG        | iPCR for cloning of NEIS1783 with the C-terminal Tag (Rev) | This study |
| NEIS0944-Fw_n    | gacgatgatgacaagCATGAAACCGAGCAGTCGGTGG    | iPCR for cloning of NEIS0944 with the N-terminal Tag (Fw)  | This study |
| NEIS0944-Rv_n    | gcagccggatctcaAACTTCACGTTACGCCGCCG       | iPCR for cloning of NEIS0944 with the N-terminal Tag (Rev) | This study |
| NEIS0408-Fw_c    | accgtagcgcaggccGAAACATTACAGACATCAAAGTTTC | iPCR for cloning of NEIS0408 with the C-terminal Tag (Fw)  | This study |
| NEIS0408-Rv_c    | atggtgatggtgatgATAGCGCAGGCTGTTGCCGGC     | iPCR for cloning of NEIS0408 with the C-terminal Tag (Rev) | This study |
| NEIS2198-Fw_n    | gacgatgatgacaagGCA CAAGAGCTTC AAACCGC    | iPCR for cloning of NEIS2198 with the N-terminal Tag (Fw)  | This study |
| NEIS2198-Rv_n    | gcagccggatctca GAATTTTATGCCGACGCGCAAG    | iPCR for cloning of NEIS2198 with the N-terminal Tag (Rev) | This study |
| NEIS1963-Fw_n    | gacgatgatgacaagGCAGAAAATAATGCCAAGGTCGTA  | iPCR for cloning of NEIS1963 with the N-terminal Tag (Fw)  | This study |
| NEIS1963-Rv_n    | gcagccggatctcaGAACTTGTAGTTCACGCCAAGC     | iPCR for cloning of NEIS1963 with the N-terminal Tag (Rev) | This study |
| NEIS1690-Fw_c    | accgtagcgcaggccGAAAATGTGCAAGCCGGACAAG    | iPCR for cloning of NEIS1690 with the C-terminal Tag (Fw)  | This study |
| NEIS1690-Rv_c    | atggtgatggtgatgGAACTTCATTTCCAAGCTAAATG   | iPCR for cloning of NEIS1690 with the C-terminal Tag (Rev) | This study |
| NEIS1690-Fw_n    | gacgatgatgacaagGAAAATGTGCAAGCCGGACAAG    | iPCR for cloning of NEIS1690 with the N-terminal Tag (Fw)  | This study |
| NEIS1690-Rv_n    | gcagccggatctcaGAACTTCATTTCCAAGCTAAATG    | iPCR for cloning of NEIS1690 with the N-terminal Tag (Rev) | This study |
| NEIS0173-Fw_n    | gacgatgatgacaagGACTTCACCATCCAAGACATCCG   | iPCR for cloning of NEIS0173 with the N-terminal Tag (Fw)  | This study |
| NEIS0173-Rv_n    | gcagccggatctcaGAACGTCGTGCCGAGTTGGAATT    | iPCR for cloning of NEIS0173 with the N-terminal Tag (Rev) | This study |
| NEIS0073-Fw_n    | gacgatgatgacaagTCCGGCTACCACTTCGGCACA     | iPCR for cloning of NEIS0073 with the N-terminal Tag (Fw)  | This study |
| NEIS0073-Rv_n    | gcagccggatctcaTTTGAATTTGTAGGTGTATTGCAGG  | iPCR for cloning of NEIS0073 with the N-terminal Tag (Rev) | This study |
| NEIS1468-Fw_n    | gacgatgatgacaagGCAAACCCTGAAACGGCGGCA     | iPCR for cloning of NEIS1468 with the N-terminal Tag (Fw)  | This study |
| NEIS1468-Rv_n    | gcagccggatctcaAACTTCATTTGAGCGCGAGGC      | iPCR for cloning of NEIS1468 with the N-terminal Tag (Rev) | This study |
| NEIS0275-Fw_c    | accgtagcgcaggccGCCGCCGATGCCGTTGCG        | iPCR for cloning of NEIS0275 with the C-terminal Tag (Fw)  | This study |

|               |                                         |                                                            |            |
|---------------|-----------------------------------------|------------------------------------------------------------|------------|
| NEIS0275-Rv_c | atggtgatggtgatGGGTCGTTTGTGCGTCCGG       | iPCR for cloning of NEIS0275 with the C-terminal Tag (Rev) | This study |
| NEIS0275-Fw_n | gacgatgatgacaagGCCGCCGATGCCGTTGCG       | iPCR for cloning of NEIS0275 with the N-terminal Tag (Fw)  | This study |
| NEIS0275-Rv_n | gcagccgatctcaGGGTCGTTTGTGCGTCCGG        | iPCR for cloning of NEIS0275 with the N-terminal Tag (Rev) | This study |
| NEIS1487-Fw_c | accgtagcgcaggccAAAAAGAAGCCGCCCCGCAT     | iPCR for cloning of NEIS1487 with the C-terminal Tag (Fw)  | This study |
| NEIS1487-Rv_c | atggtgatggtgatATTTACTTTTTGATGTCGACTTGAG | iPCR for cloning of NEIS1487 with the C-terminal Tag (Rev) | This study |
| NEIS1632-Fw_c | accgtagcgcaggccATTCCCAATACGAGCAGC       | iPCR for cloning of NEIS1632 with the C-terminal Tag (Fw)  | This study |
| NEIS1632-Rv_c | atggtgatggtgatTTTGTCGGTTGGGTATCC        | iPCR for cloning of NEIS1632 with the C-terminal Tag (Rev) | This study |
| NEIS0101-Fw_c | accgtagcgcaggccTTAAATGCGGAACATTTTTTATC  | iPCR for cloning of NEIS0101 with the C-terminal Tag (Fw)  | This study |
| NEIS0101-Rv_c | atggtgatggtgatTTCGGAGCGGTTGAAGCCAAAC    | iPCR for cloning of NEIS0101 with the C-terminal Tag (Rev) | This study |
| NEIS0101-Fw_n | gacgatgatgacaagTTAAATGCGGAACATTTTTTATC  | iPCR for cloning of NEIS0101 with the N-terminal Tag (Fw)  | This study |
| NEIS0101-Rv_n | gcagccgatctcaTTCGGAGCGGTTGAAGCCAAAC     | iPCR for cloning of NEIS0101 with the N-terminal Tag (Rev) | This study |
| NEIS1271-Fw_c | accgtagcgcaggccGCCACGACGCGGCACACAA      | iPCR for cloning of NEIS1271 with the C-terminal Tag (Fw)  | This study |
| NEIS1271-Rv_c | atggtgatggtgat ACGTATCCAGCTCGAAGGGTTCA  | iPCR for cloning of NEIS1271 with the C-terminal Tag (Rev) | This study |
| NEIS1687-Fw_n | gacgatgatgacaagGAGACCGCGCTGCAATGCGC     | iPCR for cloning of NEIS1687 with the N-terminal Tag (Fw)  | This study |
| NEIS1687-Rv_n | gcagccgatctcaGATGCCGTCCAAGTCGTTGAACA    | iPCR for cloning of NEIS1687 with the N-terminal Tag (Rev) | This study |
| NEIS0210-Fw_c | accgtagcgcaggccAACACCCTTCAAAAAGGTTTTAC  | iPCR for cloning of NEIS0210 with the C-terminal Tag (Fw)  | This study |
| NEIS0210-Rv_c | atggtgatggtgatGCTGGCAGATGCTGTGTGCG      | iPCR for cloning of NEIS0210 with the C-terminal Tag (Rev) | This study |
| NEIS0210-Fw_n | gacgatgatgacaagAACACCCTTCAAAAAGGTTTTAC  | iPCR for cloning of NEIS0210 with the N-terminal Tag (Fw)  | This study |
| NEIS0210-Rv_n | gcagccgatctcaGCTGGCAGATGCTGTGTGCG       | iPCR for cloning of NEIS0210 with the N-terminal Tag (Rev) | This study |
| NEIS2075-Fw_c | accgtagcgcaggccGCCGGCACAACAACCCAC       | iPCR for cloning of NEIS2075 with the C-terminal Tag (Fw)  | This study |
| NEIS2075-Rv_c | atggtgatggtgat ACGTGGGGAACAGTCTTTGAAGA  | iPCR for cloning of NEIS2075 with the C-terminal Tag (Rev) | This study |
| NEIS1246-Fw_c | accgtagcgcaggccCCCTCGGGCAGAAAAAGCC      | iPCR for cloning of NEIS1246 with the C-terminal Tag (Fw)  | This study |
| NEIS1246-Rv_c | atggtgatggtgatTTGACCGGTGAGGACGGTTTGC    | iPCR for cloning of NEIS1246 with the C-terminal Tag (Rev) | This study |
| NEIS0612-Fw_n | gacgatgatgacaagGAAGGCGCATCCGGCTTTTACG   | iPCR for cloning of NEIS0612 with the N-terminal Tag (Fw)  | This study |
| NEIS0612-Rv_n | gcagccgatctcaGAATTTGACGCGCACACCGGC      | iPCR for cloning of NEIS0612 with the N-terminal Tag (Rev) | This study |
| NEIS1462-Fw_c | accgtagcgcaggccGCGCCTGCTGCCGAGGCAAC     | iPCR for cloning of NEIS1462 with the C-terminal Tag (Fw)  | This study |
| NEIS1462-Rv_c | atggtgatggtgatATCGACCAAAGTCACTTTGCCGTT  | iPCR for cloning of NEIS1462 with the C-terminal Tag (Rev) | This study |
| NEIS0172-Fw_c | accgtagcgcaggccGACACCTTCAAAAAATCGGCTTT  | iPCR for cloning of NEIS0172 with the C-terminal Tag (Fw)  | This study |
| NEIS0172-Rv_c | atggtgatggtgatGCGGGCGTTCATTTCTTTAATGAC  | iPCR for cloning of NEIS0172 with the C-terminal Tag (Rev) | This study |
| NEIS1066-Fw_c | accgtagcgcaggccGAATCCTCACGCAGTCTCG      | iPCR for cloning of NEIS1066 with the C-terminal Tag (Fw)  | This study |
| NEIS1066-Rv_c | atggtgatggtgatACGGTTGGGTTGCCATG         | iPCR for cloning of NEIS1066 with the C-terminal Tag (Rev) | This study |
| NEIS0596-Fw_n | gacgatgatgacaagGGCGGCAAACGCTTTGCCG      | iPCR for cloning of NEIS0596 with the N-terminal Tag (Fw)  | This study |
| NEIS0596-Rv_n | gcagccgatctcaTCCTCCTTTGCGGCGGCGG        | iPCR for cloning of NEIS0596 with the N-terminal Tag (Rev) | This study |
| NEIS1634-Fw_c | accgtagcgcaggccAAAGGCGGAGACGCGGCGC      | iPCR for cloning of NEIS1634 with the C-terminal Tag (Fw)  | This study |
| NEIS1634-Rv_c | atggtgatggtgatTTCCGCTCAGAAGCAGTTTTGG    | iPCR for cloning of NEIS1634 with the C-terminal Tag (Rev) | This study |

|               |                                           |                                                            |            |
|---------------|-------------------------------------------|------------------------------------------------------------|------------|
| NEIS0653-Fw_c | accgtagcgcaggccACTCAAGGTACGGTCGATAAAAGATG | iPCR for cloning of NEIS0653 with the C-terminal Tag (Fw)  | This study |
| NEIS0653-Rv_c | atggtgatggtgatgATGCCAGTAACGCCACCAGGGC     | iPCR for cloning of NEIS0653 with the C-terminal Tag (Rev) | This study |
| NEIS0196-Fw_c | accgtagcgcaggccAGCGTCGAACGCGTTTCAC        | iPCR for cloning of NEIS0196 with the C-terminal Tag (Fw)  | This study |
| NEIS0196-Rv_c | atggtgatggtgatgGAATTTTATGCCGACGCG         | iPCR for cloning of NEIS0196 with the C-terminal Tag (Rev) | This study |
| NEIS1065-Fw_c | accgtagcgcaggccAACGGGCA AAAATCCCTG TA     | iPCR for cloning of NEIS1065 with the C-terminal Tag (Fw)  | This study |
| NEIS1065-Rv_c | atggtgatggtgatgTCGCTTGCCTCCTTTAC          | iPCR for cloning of NEIS1065 with the C-terminal Tag (Rev) | This study |
| porAkoUPF     | ctgtactccaggcGAATCTAGGACGCAGGGTTAAG       | Amplification of <i>porA</i> promoter and CDS (Fw)         | This study |
| porAkoDOR     | aattaagtcgcttaAAGTCCGGAGAGTCGTAGCGTAC     | Amplification of <i>porA</i> promoter and CDS (Rev)        | This study |
| porAkoUPR     | gctgctccccgatgCAGTCTC                     | vPCR for <i>porA</i> knock-out mutant (Rev)                | This study |
| porAkoDOF     | tattactagtcgacaACTTACCGCCCTCGTATTGTC      | vPCR for <i>porA</i> knock-out mutant (Fw)                 | This study |
| porAkoDOR     | aattaagtcgcttaAAGTCCGGAGAGTCGTAGCGTAC     | Amplification of <i>porA</i> promoter and CDS (Rev)        | This study |
| CSporAF       | catccggcagcagcGACATCTTGTTACCGTGAAG        | iPCR of <i>tetR-sacB-specR</i> selection cassette (Fw)     | This study |
| CSporAR       | cggtattgcgtttcaTTCGCGGTGGCTGAGATCAG       | iPCR of <i>tetR-sacB-specR</i> selection cassette (Rev)    | This study |

Capital letters correspond to nucleotides of the meningococcal sequence or of the vectors, whereas small letters of each primer sequence correspond to the 15 base complementary overlaps used for PIPE-cloning.

**Supplementary Table 5. List of plasmids used in this study.**

| Name                    | Description                                                                                                 | Antibiotic resistance | Reference  |
|-------------------------|-------------------------------------------------------------------------------------------------------------|-----------------------|------------|
| pET15-LPompA 6xHis+FLAG | pET15 derivative containing the LP of <i>E. coli</i> ompA followed by 6 Histidine residues and the FLAG tag | AmpR                  | This study |
| pET21-LPompA 6xHis+FLAG | pET21 derivative containing the LP of <i>E. coli</i> ompA followed by 6 Histidine residues and the FLAG tag | AmpR                  | This study |
| pET21-LPompA NEIS2020_N | pET21-LPompA 6xHis+FLAG. Costruct for NEIS2020 expression with N-terminal tag                               | AmpR                  | This study |
| pET21-LPompA NEIS1364_N | pET21-LPompA 6xHis+FLAG. Costruct for NEIS1364 expression with N-terminal tag                               | AmpR                  | This study |
| pET21-LPompA NEIS1428_N | pET21-LPompA 6xHis+FLAG. Costruct for NEIS1428 expression with N-terminal tag                               | AmpR                  | This study |
| pET21-LPompA NEIS1783_C | pET21-LPompA 6xHis+FLAG. Costruct for NEIS1783 expression with C-terminal tag                               | AmpR                  | This study |
| pET21-LPompA NEIS0944_N | pET21-LPompA 6xHis+FLAG. Costruct for NEIS0944 expression with N-terminal tag                               | AmpR                  | This study |
| pET21-LPompA NEIS0408_C | pET21-LPompA 6xHis+FLAG. Costruct for NEIS0408 expression with C-terminal tag                               | AmpR                  | This study |
| pET21-LPompA NEIS2198_N | pET21-LPompA 6xHis+FLAG. Costruct for NEIS2198 expression with N-terminal tag                               | AmpR                  | This study |
| pET21-LPompA NEIS1963_N | pET21-LPompA 6xHis+FLAG. Costruct for NEIS1963 expression with N-terminal tag                               | AmpR                  | This study |
| pET21-LPompA NEIS1690_C | pET21-LPompA 6xHis+FLAG. Costruct for NEIS1690 expression with C-terminal tag                               | AmpR                  | This study |
| pET21-LPompA NEIS1690_N | pET21-LPompA 6xHis+FLAG. Costruct for NEIS1690 expression with N-terminal tag                               | AmpR                  | This study |
| pET21-LPompA NEIS0173_N | pET21-LPompA 6xHis+FLAG. Costruct for NEIS0173 expression with N-terminal tag                               | AmpR                  | This study |
| pET21-LPompA NEIS0073_N | pET21-LPompA 6xHis+FLAG. Costruct for NEIS0073 expression with N-terminal tag                               | AmpR                  | This study |
| pET21-LPompA NEIS1468_N | pET21-LPompA 6xHis+FLAG. Costruct for NEIS1468 expression with N-terminal tag                               | AmpR                  | This study |
| pET21-LPompA NEIS0275_C | pET21-LPompA 6xHis+FLAG. Costruct for NEIS0275 expression with C-terminal tag                               | AmpR                  | This study |
| pET21-LPompA NEIS0275_N | pET21-LPompA 6xHis+FLAG. Costruct for NEIS0275 expression with N-terminal tag                               | AmpR                  | This study |
| pET21-LPompA NEIS1487_C | pET21-LPompA 6xHis+FLAG. Costruct for NEIS1487 expression with C-terminal tag                               | AmpR                  | This study |
| pET21-LPompA NEIS1632_C | pET21-LPompA 6xHis+FLAG. Costruct for NEIS1632 expression with C-terminal tag                               | AmpR                  | This study |
| pET21-LPompA NEIS0101_C | pET21-LPompA 6xHis+FLAG. Costruct for NEIS0101 expression with C-terminal tag                               | AmpR                  | This study |
| pET21-LPompA NEIS0101_N | pET21-LPompA 6xHis+FLAG. Costruct for NEIS0101 expression with N-terminal tag                               | AmpR                  | This study |
| pET21-LPompA NEIS1271_C | pET21-LPompA 6xHis+FLAG. Costruct for NEIS1271 expression with C-terminal tag                               | AmpR                  | This study |
| pET21-LPompA NEIS1687_N | pET21-LPompA 6xHis+FLAG. Costruct for NEIS1687 expression with N-terminal tag                               | AmpR                  | This study |
| pET21-LPompA NEIS0210_C | pET21-LPompA 6xHis+FLAG. Costruct for NEIS0210 expression with C-terminal tag                               | AmpR                  | This study |
| pET21-LPompA NEIS0210_N | pET21-LPompA 6xHis+FLAG. Costruct for NEIS0210 expression with N-terminal tag                               | AmpR                  | This study |
| pET21-LPompA NEIS2075_C | pET21-LPompA 6xHis+FLAG. Costruct for NEIS2075 expression with C-terminal tag                               | AmpR                  | This study |
| pET21-LPompA NEIS1246_C | pET21-LPompA 6xHis+FLAG. Costruct for NEIS1246 expression with C-terminal tag                               | AmpR                  | This study |
| pET21-LPompA NEIS0612_N | pET21-LPompA 6xHis+FLAG. Costruct for NEIS0612 expression with N-terminal tag                               | AmpR                  | This study |
| pET21-LPompA NEIS1462_C | pET21-LPompA 6xHis+FLAG. Costruct for NEIS1462 expression with C-terminal tag                               | AmpR                  | This study |

|                                   |                                                                                                                 |             |              |
|-----------------------------------|-----------------------------------------------------------------------------------------------------------------|-------------|--------------|
| pET21-LPompA NEIS0172_C           | pET21-LPompA 6xHis+FLAG. Costruct for NEIS0172 expression with C-terminal tag                                   | AmpR        | This study   |
| pET21-LPompA NEIS1066_C           | pET21-LPompA 6xHis+FLAG. Costruct for NEIS1066 expression with C-terminal tag                                   | AmpR        | This study   |
| pET21-LPompA NEIS0596_N           | pET21-LPompA 6xHis+FLAG. Costruct for NEIS0596 expression with N-terminal tag                                   | AmpR        | This study   |
| pET21-LPompA NEIS1634_C           | pET21-LPompA 6xHis+FLAG. Costruct for NEIS1634 expression with C-terminal tag                                   | AmpR        | This study   |
| pET21-LPompA NEIS0653_C           | pET21-LPompA 6xHis+FLAG. Costruct for NEIS0653 expression with C-terminal tag                                   | AmpR        | This study   |
| pET21-LPompA NEIS0196_C           | pET21-LPompA 6xHis+FLAG. Costruct for NEIS0196 expression with C-terminal tag                                   | AmpR        | This study   |
| pET21-LPompA NEIS1065_C           | pET21-LPompA 6xHis+FLAG. Costruct for NEIS1065 expression with C-terminal tag                                   | AmpR        | This study   |
| pET15- $\Delta$ <i>porA</i> SpecR | pET15 with the UP and DOWN <i>porA</i> -regions for the recombination which contains a Spec resistance cassette | AmpR, SpecR | This study   |
| pBS- $\Delta$ <i>opcA</i> KanR    | pBS with the UP and DOWN <i>opcA</i> -regions for the recombination which contains a Kan resistance cassette    | AmpR, KanR  | <sup>2</sup> |
| pBS- $\Delta$ <i>nspA</i> EryR    | pBS with the UP and DOWN <i>nspA</i> -regions for the recombination which contains a Ery resistance cassette    | AmpR, EryR  | <sup>2</sup> |

AmpR, ampicillin resistance; EryR, erythromycin resistance; KanR, kanamycin resistance; SpecR, spectinomycin resistance.

## References

- 1 Tettelin, H. *et al.* Complete genome sequence of *Neisseria meningitidis* serogroup B strain MC58. *Science* **287**, 1809-1815, doi:10.1126/science.287.5459.1809 (2000).
- 2 Echenique-Rivera, H. *et al.* Transcriptome analysis of *Neisseria meningitidis* in human whole blood and mutagenesis studies identify virulence factors involved in blood survival. *PLoS Pathog* **7**, e1002027, doi:10.1371/journal.ppat.1002027 (2011).
- 3 Fantappie, L. *et al.* Antibody-mediated immunity induced by engineered *Escherichia coli* OMVs carrying heterologous antigens in their lumen. *J Extracell Vesicles* **3**, doi:10.3402/jev.v3.24015 (2014).
- 4 Berlanda Scorza, F. *et al.* Proteomics characterization of outer membrane vesicles from the extraintestinal pathogenic *Escherichia coli* DeltatolR IHE3034 mutant. *Mol Cell Proteomics* **7**, 473-485, doi:10.1074/mcp.M700295-MCP200 (2008).
